# Supplementary material for: Understanding community health worker employment preferences in Malang district, Indonesia, using a discrete choice experiment
Source: HighWire-hosted journal article supplement (doi:10.1136/bmjgh-2022-008936), 2022-08-01
Supplement: bmjgh-2022-008936supp001_data_supplement.pdf [file bmjgh-2022-008936supp001_data_supplement.pdf]

## 1 Online supplemental file 1

## 2 Results from multinomial logit model for full sample (AIC = 11822.8, BIC = 11889.2)

| Attribute                       | Level                      | $\beta$        | SE       | 95%CI    |          |
|---------------------------------|----------------------------|----------------|----------|----------|----------|
| <b>Supervision</b>              | District Health Authority  | 0.08           | <i>a</i> | <i>a</i> | <i>a</i> |
|                                 | Nurse and/or midwife       | -0.08          | 0.02     | -0.04    | 0.02     |
| <b>Training frequency</b>       | Sporadic training          | -0.02          | <i>a</i> | <i>a</i> | <i>a</i> |
|                                 | 3-day training course      | 0.02           | 0.02     | -0.01    | 0.05     |
| <b>Benefits per month (IDR)</b> | 25,000                     | <b>0.37**</b>  | 0.04     | 0.29     | 0.44     |
|                                 | 100,000                    | <b>-0.10*</b>  | 0.04     | -0.18    | -0.02    |
|                                 | 300,000                    | <b>-0.15**</b> | 0.04     | -0.23    | -0.07    |
|                                 | 500,000                    | -0.12          | <i>a</i> | <i>a</i> | <i>a</i> |
| <b>Form of recognition</b>      | None                       | -0.03          | <i>a</i> | <i>a</i> | <i>a</i> |
|                                 | Official endorsement       | -0.04          | 0.03     | -0.11    | 0.02     |
|                                 | Award for good performance | -0.03          | 0.03     | -0.09    | 0.04     |
|                                 | Report on results          | <b>0.10**</b>  | 0.03     | 0.04     | 0.16     |
| <b>Employment structure</b>     | No employment contract     | -0.07          | <i>a</i> | <i>a</i> | <i>a</i> |
|                                 | Employment contract        | <b>0.07**</b>  | 0.02     | 0.04     | 0.11     |
| <b>Neither job</b>              | NA                         | <b>-0.62**</b> | 0.03     | -0.69    | -0.56    |

3 \* Significant at 5% level; \*\*Significant at 1% level or less; *a* Reference level
