# Supplementary material for: Understanding community health worker employment preferences in Malang district, Indonesia, using a discrete choice experiment
Source: HighWire-hosted journal article supplement (doi:10.1136/bmjgh-2022-008936), 2022-08-01
Supplement: bmjgh-2022-008936supp002_data_supplement.pdf [file bmjgh-2022-008936supp002_data_supplement.pdf]

**Online supplemental file 2****Model fit statistics for latent class models.**

| <b>Model fit statistics</b>                        | <b>2</b> | <b>3</b> | <b>4</b> |
|----------------------------------------------------|----------|----------|----------|
| Log-likelihood function                            | -4539.82 | -4457.21 | -4042.92 |
| Pseudo R <sup>2</sup>                              | 0.269    | 0.282    | 0.349    |
| AIC                                                | 9121.6   | 8984.4   | 8171.8   |
| BIC                                                | 9261.1   | 9216.8   | 8457.35  |
| Size of the smallest group (proportion of sample)  | 31.2%    | 12.3%    | 2.1%     |
| Size of the smallest group (estimated respondents) | 147      | 58       | 10       |

AIC: Akaike information criterion

BIC: Bayesian information criterion
