# Supplementary material for: Understanding community health worker employment preferences in Malang district, Indonesia, using a discrete choice experiment
Source: HighWire-hosted journal article supplement (doi:10.1136/bmjgh-2022-008936), 2022-08-01
Supplement: bmjgh-2022-008936supp004_data_supplement.pdf [file bmjgh-2022-008936supp004_data_supplement.pdf]

## Online supplemental file 4

Table 1. Socio-demographic characteristics of estimated groups

| Socio-demographic characteristics of estimated groups             | Group 1 (%) | Group 2 (%) | $\chi^2$ p-value |
|-------------------------------------------------------------------|-------------|-------------|------------------|
| Average age                                                       | 43          | 40          |                  |
| Proportion aged <29 years                                         | 9.3         | 18.4        | 0.07             |
| Proportion aged 30 – 39 years                                     | 31.2        | 28.6        | 0.07             |
| Proportion aged 40 – 49 years                                     | 35.2        | 33.3        | 0.07             |
| Proportion aged 50 years plus                                     | 24.4        | 19.7        | 0.07             |
| Proportion with <10 years' experience                             | 47.8        | 51.0        | 0.02             |
| Proportion with 10 – 19 years' experience                         | 30.9        | 38.8        | 0.02             |
| Proportion with more than 20 years' experience                    | 21.3        | 10.2        | 0.02             |
| Proportion with primary school education obtainment               | 17.6        | 19.1        | 0.64             |
| Proportion with secondary school education obtainment             | 76.9        | 74.2        | 0.64             |
| Proportion with university education obtainment                   | 5.6         | 6.8         | 0.64             |
| Proportion who work <2 hours per week                             | 55.3        | 27.2        | <0.01            |
| Proportion who work 2 – 4 hours per week                          | 34.9        | 26.5        | <0.01            |
| Proportion who work 4 plus hours per week                         | 9.9         | 46.3        | <0.01            |
| Proportion with avg. weekly income of 250,000 – 500,000 IDR       | 46.9        | 66.7        | <0.01            |
| Proportion with avg. weekly income of 500,000 IDR – 1 million IDR | 46.0        | 29.9        | <0.01            |
| Proportion with avg. weekly income above 1 million IDR            | 7.1         | 3.4         | <0.01            |
| Proportion who are main source of household income                | 17.6        | 6.1         | <0.01            |
| Proportion who are not main source of household income            | 82.4        | 93.9        | <0.01            |
